# Supplementary material for: THY1 is a prognostic-related biomarker via mediating immune infiltration in lung squamous cell carcinoma (LUSC)
Source: publisher site journal article supplement (doi:10.18632/aging.205880), 2024-05-30
Supplement: Supplementary file [file aging-v16i11-205880-supplementary-material-SD1.pdf]

**SUPPLEMENTARY FIGURES**

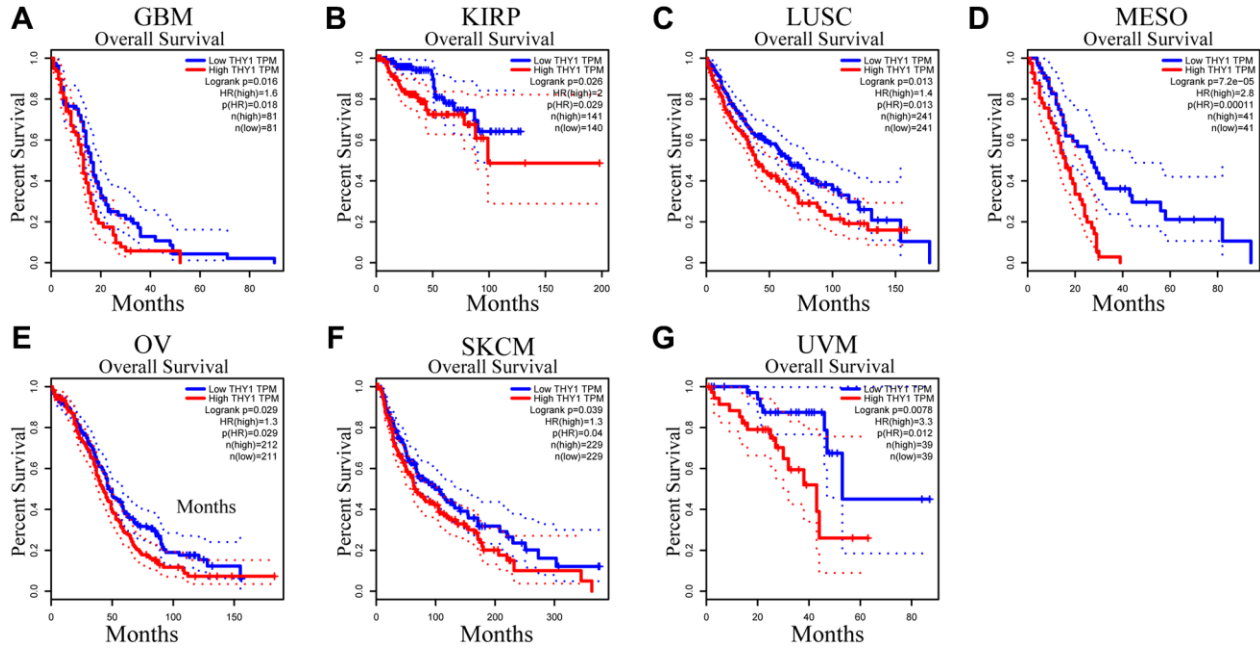

**Supplementary Figure 1. The prognostic values (overall survival) of differentially expressed *THY1* in many types of cancers. (A–G) Kaplan-Meier survival curves of up-regulated *THY1* in glioblastoma multiforme (GBM), kidney renal papillary cell carcinoma (KIRP), lung squamous cell carcinoma (LUSC), mesothelioma (MESO), ovarian cancer (OV), skin cutaneous melanoma (SKCM), and uveal melanoma (UVM) from GEPIA database.**

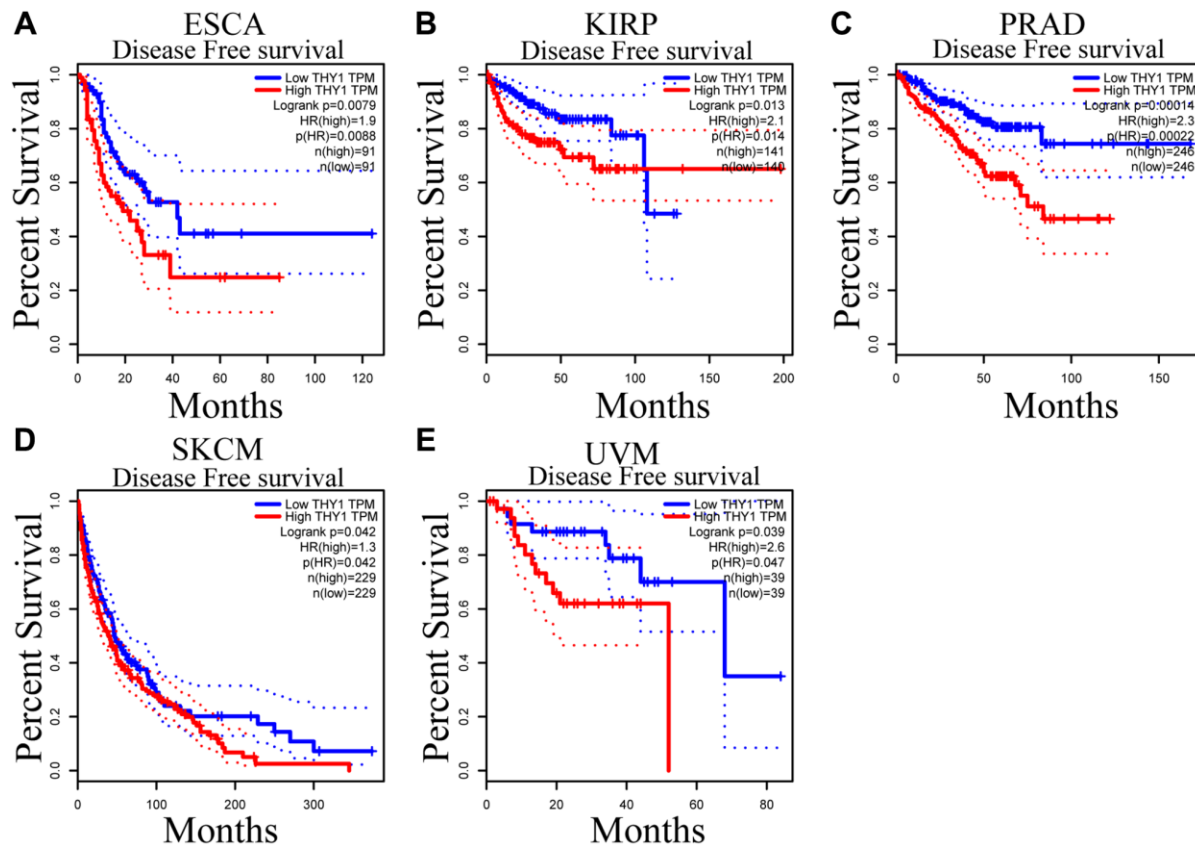

**Supplementary Figure 2. The prognostic values (disease free survival) of differentially expressed *THY1* in many types of cancers. (A–E) Kaplan-Meier survival curves of up-regulated *THY1* in esophageal carcinoma (ESCA), kidney renal papillary cell carcinoma (KIRP), prostate adenocarcinoma (PRAD), skin cutaneous melanoma (SKCM), and uveal melanoma (UVM) from GEPIA database.**

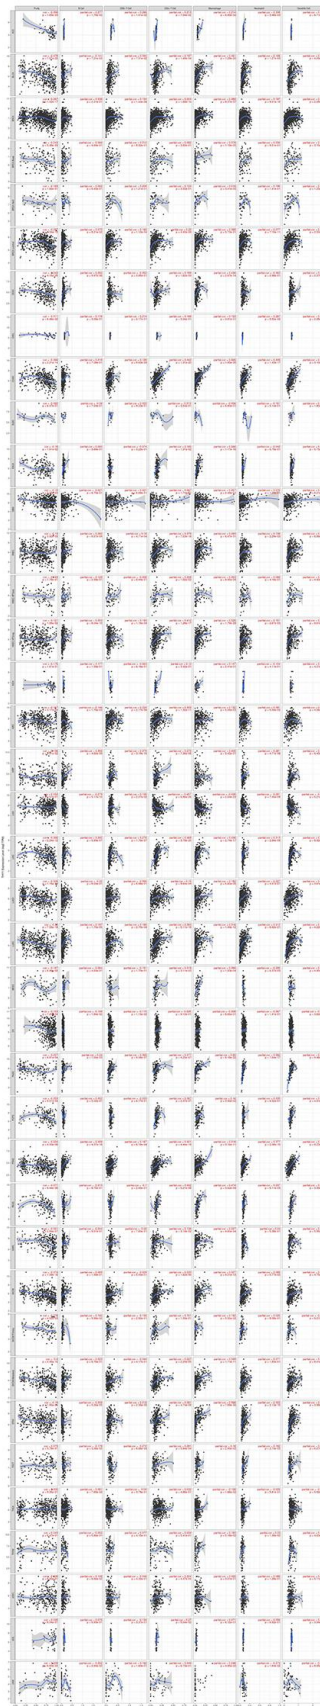

Supplementary Figure 3. The relationships between *THY1* expression and immune infiltration levels in 33 types of cancer from TCGA in TIMER database.
