# Supplementary material for: THY1 is a prognostic-related biomarker via mediating immune infiltration in lung squamous cell carcinoma (LUSC)
Source: publisher site journal article supplement (doi:10.18632/aging.205880), 2024-05-30
Supplement: Supplementary file [file aging-v16i11-205880-supplementary-material-SD2.pdf]

## SUPPLEMENTARY TABLE

**Supplementary Table 1. Kaplan-Meier plotter to determine the effect of different clinicopathological factors on the expression of THY1 gene and clinical prognosis in LUSC.**

| Clinicopathological characteristics                   | OS       |                   |          | FP       |                  |          | PPS      |                  |          |
|-------------------------------------------------------|----------|-------------------|----------|----------|------------------|----------|----------|------------------|----------|
|                                                       | <i>N</i> | HR                | <i>P</i> | <i>N</i> | HR               | <i>P</i> | <i>N</i> | HR               | <i>P</i> |
| <b>Sex</b>                                            |          |                   |          |          |                  |          |          |                  |          |
| Female                                                | 129      | 0.47 (0.26–0.85)  | 0.011    | 29       | 0.03 (0–0.29)    | 2.60E-06 | 4        | /                | /        |
| Male                                                  | 342      | 1.3 (0.99–1.72)   | 0.06     | 112      | 0.62 (0.34–1.14) | 0.12     | 16       | /                | /        |
| <b>Stage</b>                                          |          |                   |          |          |                  |          |          |                  |          |
| 1                                                     | 172      | 0.84 (0.54–1.31)  | 0.44     | 33       | 0.29 (0.08–1.1)  | 0.054    | 9        | /                | /        |
| 2                                                     | 100      | 0.4 (0.2–0.82)    | 0.0093   | 24       | 0.36 (0.07–2.03) | 0.23     | 6        | /                | /        |
| 3                                                     | 43       | 1.56 (0.77–3.17)  | 0.21     | 9        | /                | /        | 5        | /                | /        |
| <b>Grade</b>                                          |          |                   |          |          |                  |          |          |                  |          |
| I                                                     | 22       | 0.59 (0.19–1.78)  | 0.34     | 0        | /                | /        | 0        | /                | /        |
| II                                                    | 73       | 0.58 (0.27–1.2)   | 0.14     | 0        | /                | /        | 0        | /                | /        |
| III                                                   | 15       | /                 | /        | 0        | /                | /        | 0        | /                | /        |
| <b>AJCC Stage T</b>                                   |          |                   |          |          |                  |          |          |                  |          |
| 1                                                     | 106      | 1.6 (0.92–2.79)   | 0.094    | 9        | /                | /        | 3        | /                | /        |
| 2                                                     | 160      | 0.61 (0.38–0.99)  | 0.042    | 32       | 0.28 (0.03–2.3)  | 0.2      | 7        | /                | /        |
| 3                                                     | 25       | 1.9 (0.6–6)       | 0.27     | 0        | /                | /        | 0        | /                | /        |
| 4                                                     | 13       | /                 | /        | 0        | /                | /        | 0        | /                | /        |
| <b>AJCC Stage N</b>                                   |          |                   |          |          |                  |          |          |                  |          |
| 0                                                     | 208      | 1.27 (0.85–1.88)  | 0.24     | 25       | 0.35 (0.04–3.08) | 0.33     | 6        | /                | /        |
| 1                                                     | 252      | 0.72 (0.52–0.99)  | 0.045    | 130      | 0.45 (0.28–0.72) | 0.00065  | 71       | 0.73 (0.43–1.24) | 0.24     |
| 2                                                     | 19       | /                 | /        | 0        | /                | /        | 0        | /                | /        |
| <b>AJCC Stage M</b>                                   |          |                   |          |          |                  |          |          |                  |          |
| 0                                                     | 300      | 0.72 (0.49–1.05)  | 0.085    | 41       | 0.4 (0.11–1.44)  | 0.15     | 10       | /                | /        |
| 1                                                     | 10       | /                 | /        | 0        | /                | /        | 0        | /                | /        |
| <b>Surgery success only surgical margins negative</b> |          |                   |          |          |                  |          |          |                  |          |
| Chemotherapy                                          |          |                   |          |          |                  |          |          |                  |          |
| Yes                                                   | 42       | 4.38 (0.76–25.43) | 0.079    | 15       | /                | /        | 8        | /                | /        |
| No                                                    | 35       | 2.94 (0.9–9.56)   | 0.06     | 10       | /                | /        | 2        | /                | /        |

Abbreviations: LUSC: Lung Squamous Cell Carcinoma; OS: Overall Survival; FP: First Progression; PPS: Post-progression Survival; HR: Hazard Ratio.
